# Supplementary material for: Hydroxypropyl-Beta Cyclodextrin Barrier Prevents Respiratory Viral Infections: A Preclinical Study
Source: MDPI journal article supplement (doi:10.3390/ijms25042061), 2024-02-08
Supplement: s1 [file s1]

## Supplementary Material

Supplementary Table S1: SARS-CoV-2 pseudotype variant classification. \* SARS-CoV-2 Interagency Group (SIG) classification: Variant Being Monitored (VBM); Variant of Concern (VOC).

| Pango Lineage          | WHO Label            | Significant Clinical Characteristics                                       | SIG Variant Classification* | Predominant Spike (S) Protein Mutations                               |
|------------------------|----------------------|----------------------------------------------------------------------------|-----------------------------|-----------------------------------------------------------------------|
| A (19A)                | Wuhan                | One of the original haplotypes                                             | VBM                         | D614G                                                                 |
| B.1.427<br>B.1.429     | Epsilon<br>(Cal.20C) | Increased transmission; reduced susceptibility to antibodies               | VBM                         | D614G, L452R, S13I, W152C                                             |
| B.1.617.1<br>B.1.617.2 | Delta<br>(India)     | Possible reduced susceptibility to antibodies                              | VOC                         | T19R, G142D, 156del, 157del, R158G, L452R, T478K, D614G, P681R, D950N |
| P.1                    | Gamma<br>(Brazil)    | Significantly reduced susceptibility to antibodies                         | VBM                         | E484K, K417T, N501Y                                                   |
| B.1.351                | Beta<br>(S. Africa)  | Increased transmission; significantly reduced susceptibility to antibodies | VBM                         | L18F, D80A, D215G, 241-243del, K417N, E484K, N501Y, D614G, A701V      |
| B.1.1.7                | Alpha<br>(U.K.)      | Increased transmission; possible increased disease severity                | VBM                         | 69-70del, 144del, N501Y, A570D, D614G, P681H, T716I, S982A, D1118H    |

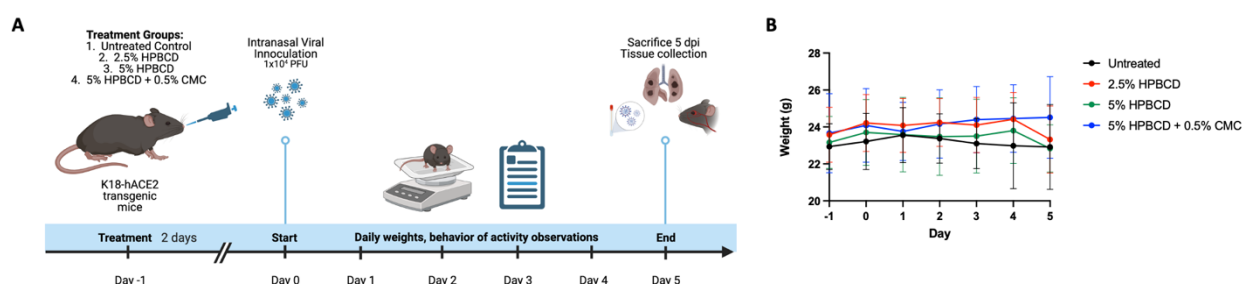

**Supplementary Figure S1.** K18-hACE2 mouse study design (A) 8 week-old K18-hACE2 SARS-CoV-2 study design using the SARS-CoV-2 Delta variant (B) Mouse weights recorded over the duration of study.
